# Supplementary material for: Comparative genomic, transcriptomic, and proteomic reannotation of human herpesvirus 6
Source: PubMed Central journal article supplement (PMC5859498; doi:10.1186/s12864-018-4604-2), 2018-03-20

HHV-6B Z29 (NC\_000898)

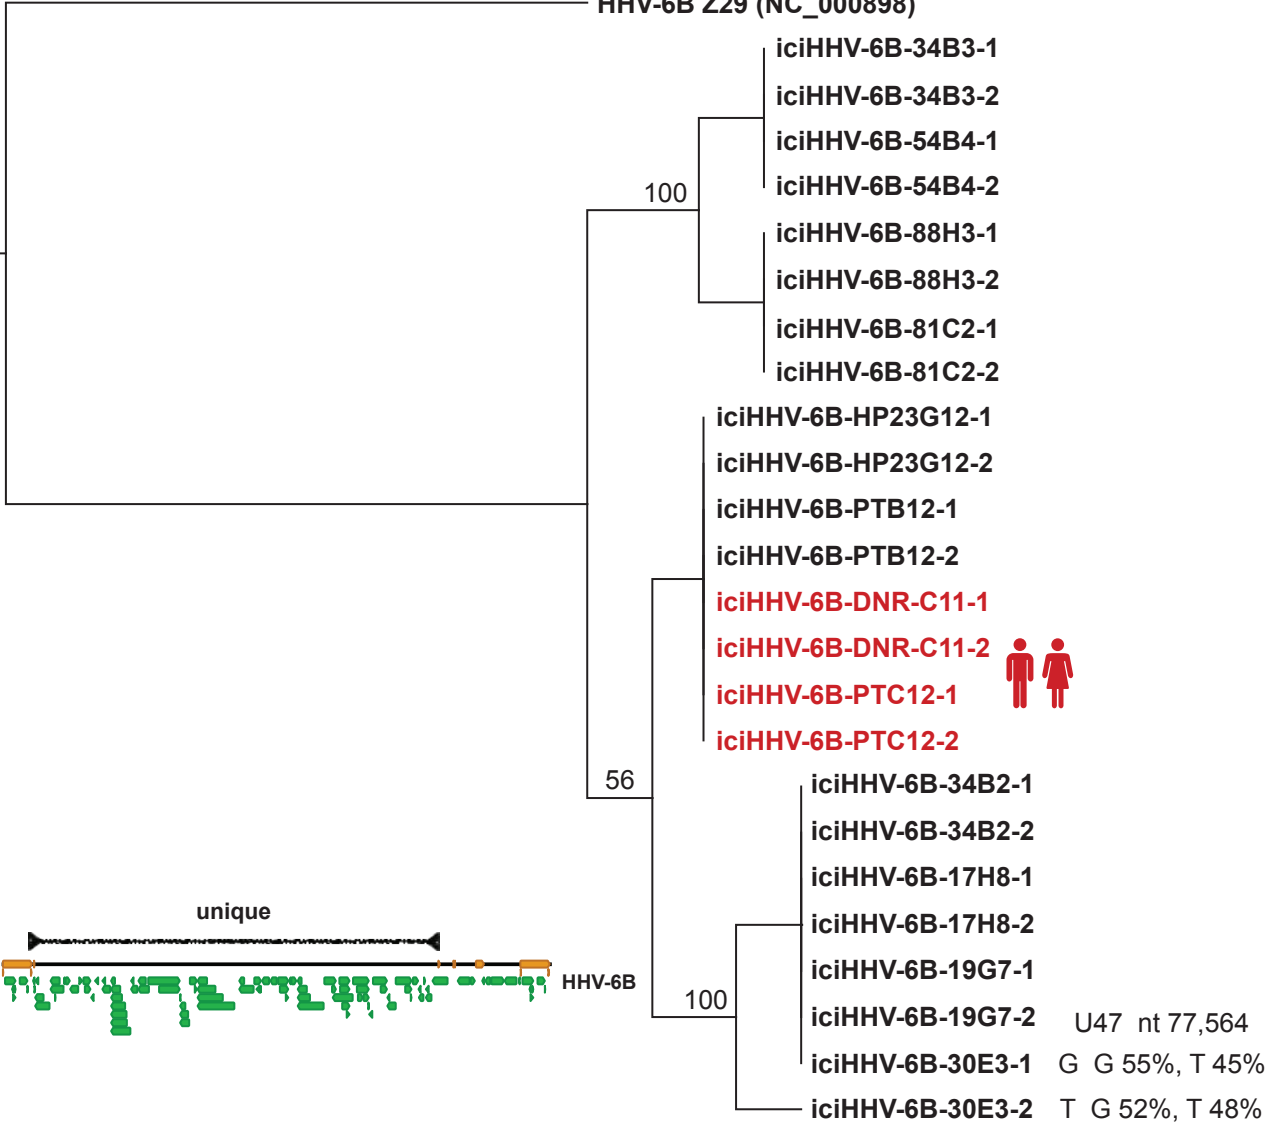

Supplement: 12864_2018_4604_MOESM2_ESM.pdf [file 12864_2018_4604_MOESM2_ESM.pdf]
