# Supplementary material for: Comparative genomic, transcriptomic, and proteomic reannotation of human herpesvirus 6
Source: PubMed Central journal article supplement (PMC5859498; doi:10.1186/s12864-018-4604-2), 2018-03-20
Supplement: 12864_2018_4604_MOESM4_ESM.pdf [file 12864_2018_4604_MOESM4_ESM.pdf]

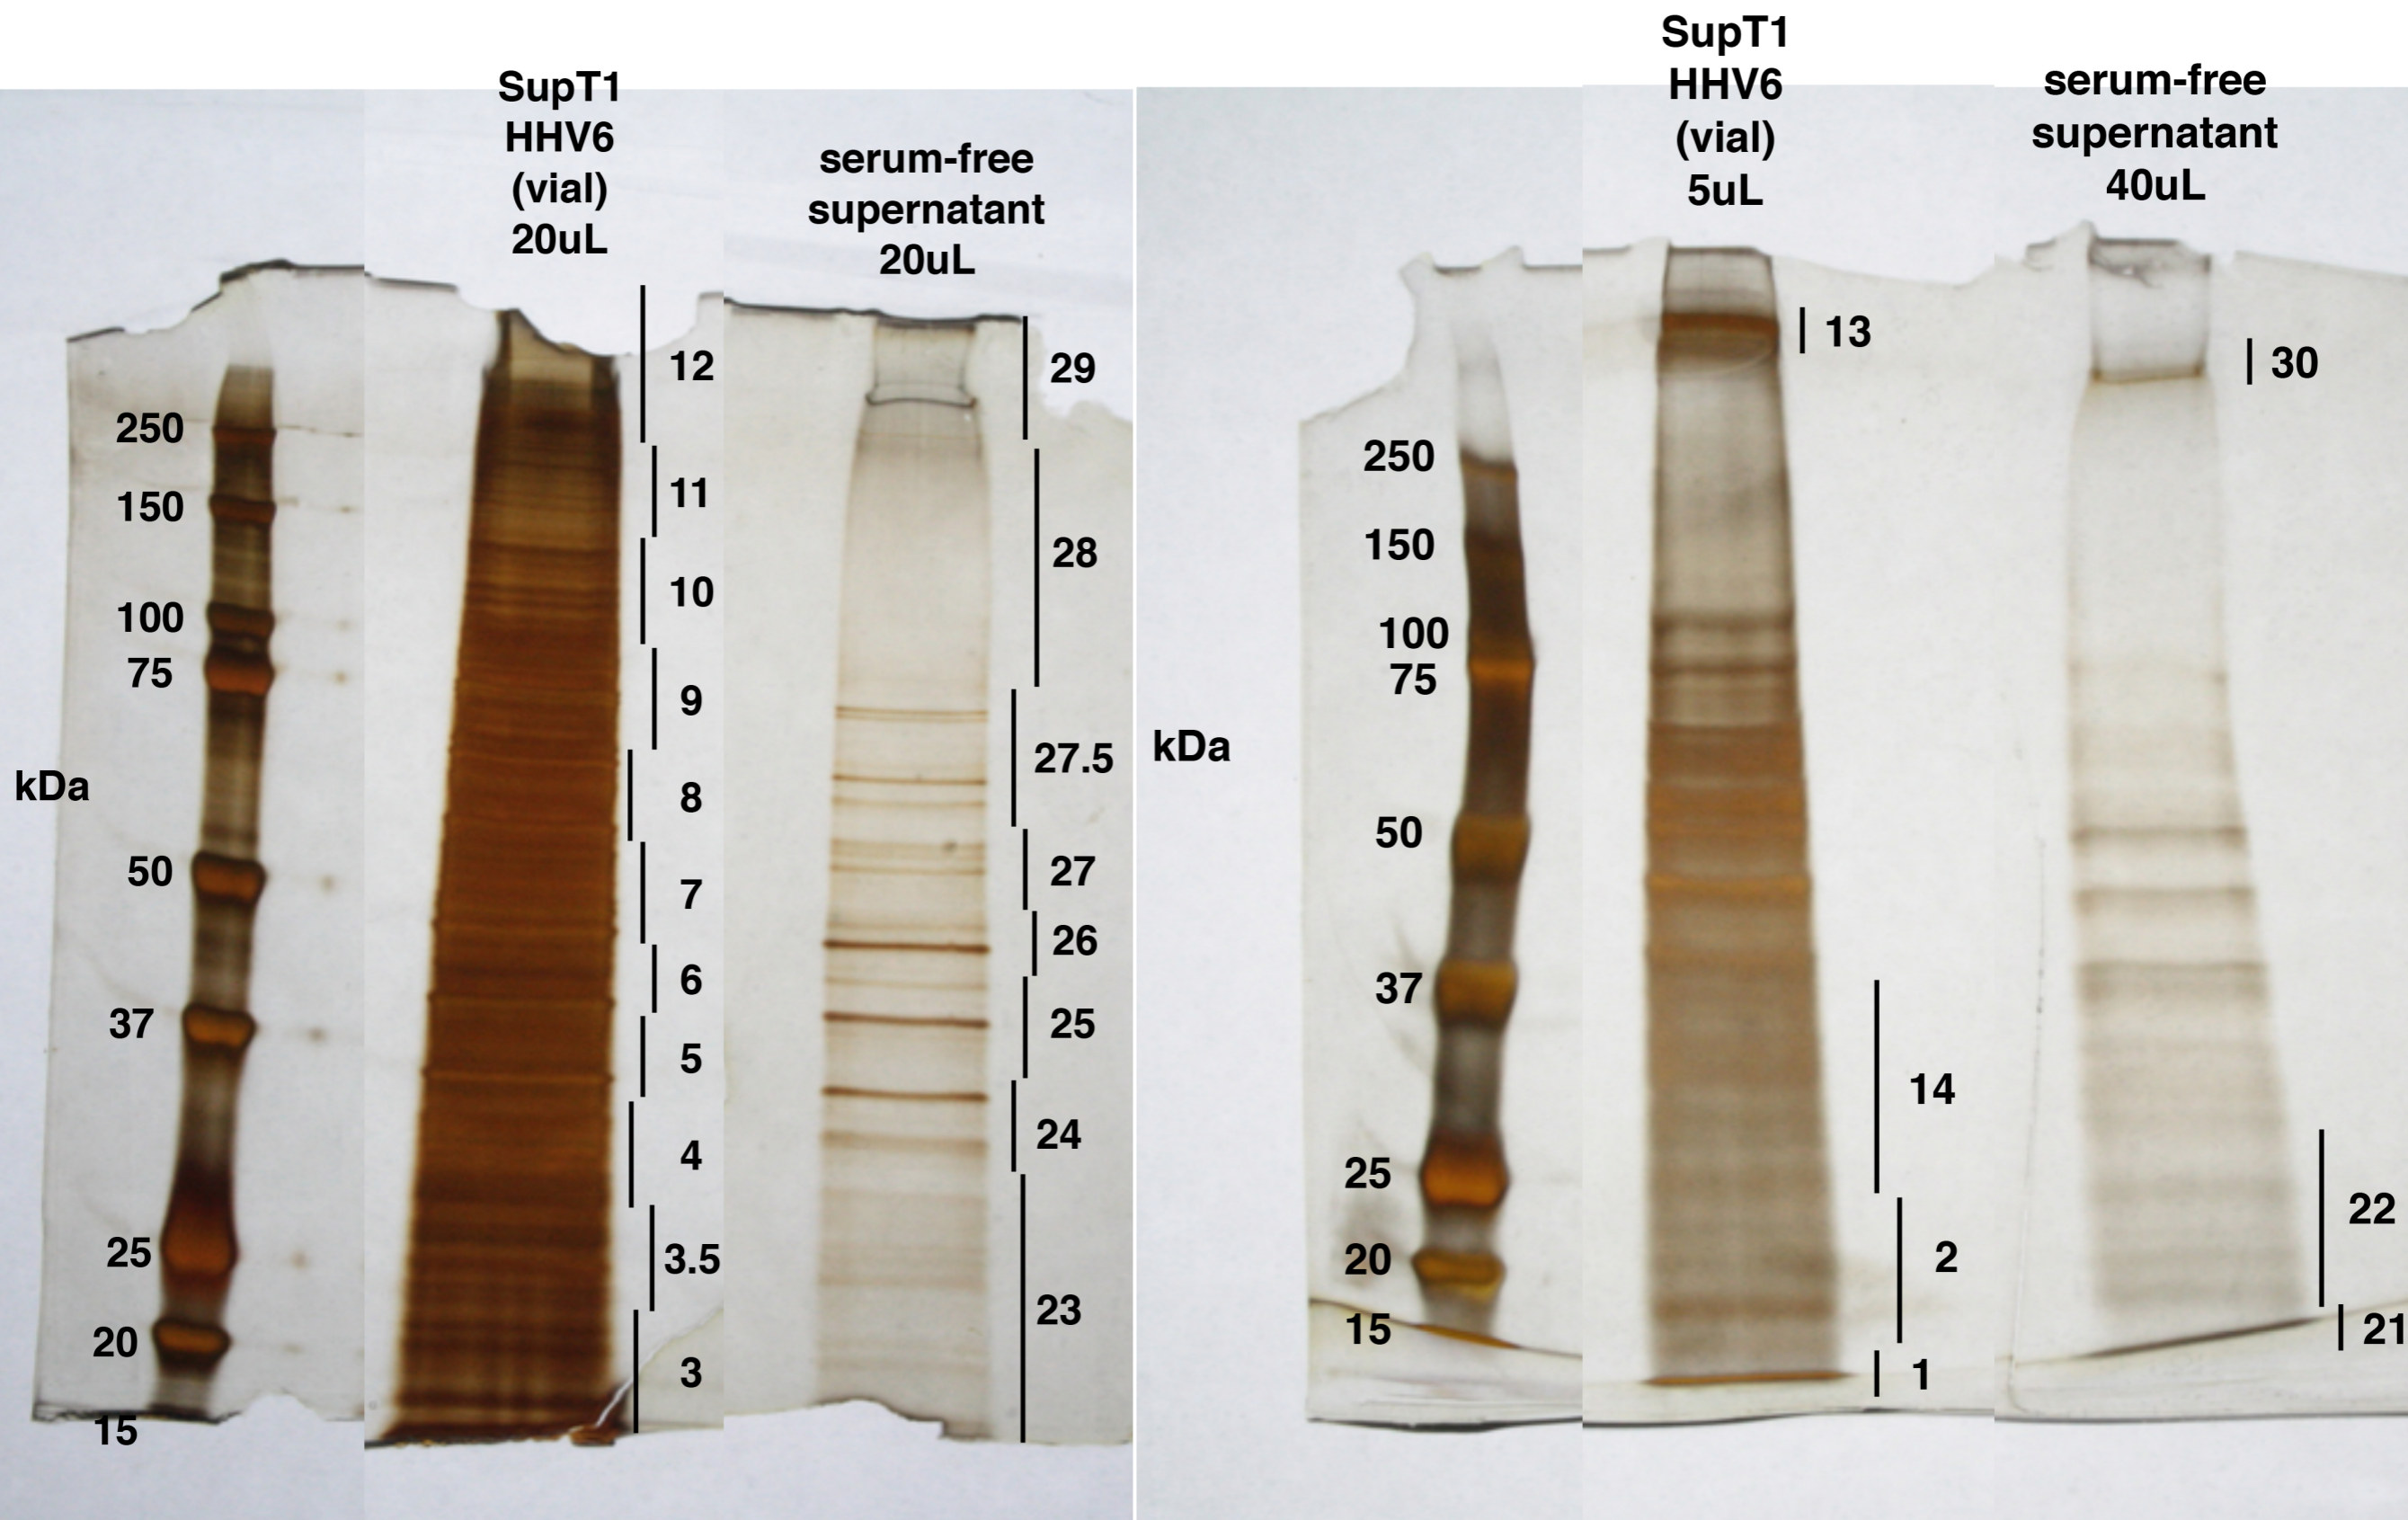

S3 Figure - Non-contiguous gel images of silver stain of HHV-6B Z29 lysates in SupT1 cells or serum-free supernatant run on 10-20% TrisHCl gels in MOPS buffer
