# Supplementary material for: Comparative genomic, transcriptomic, and proteomic reannotation of human herpesvirus 6
Source: PubMed Central journal article supplement (PMC5859498; doi:10.1186/s12864-018-4604-2), 2018-03-20
Supplement: 12864_2018_4604_MOESM5_ESM.pdf [file 12864_2018_4604_MOESM5_ESM.pdf]

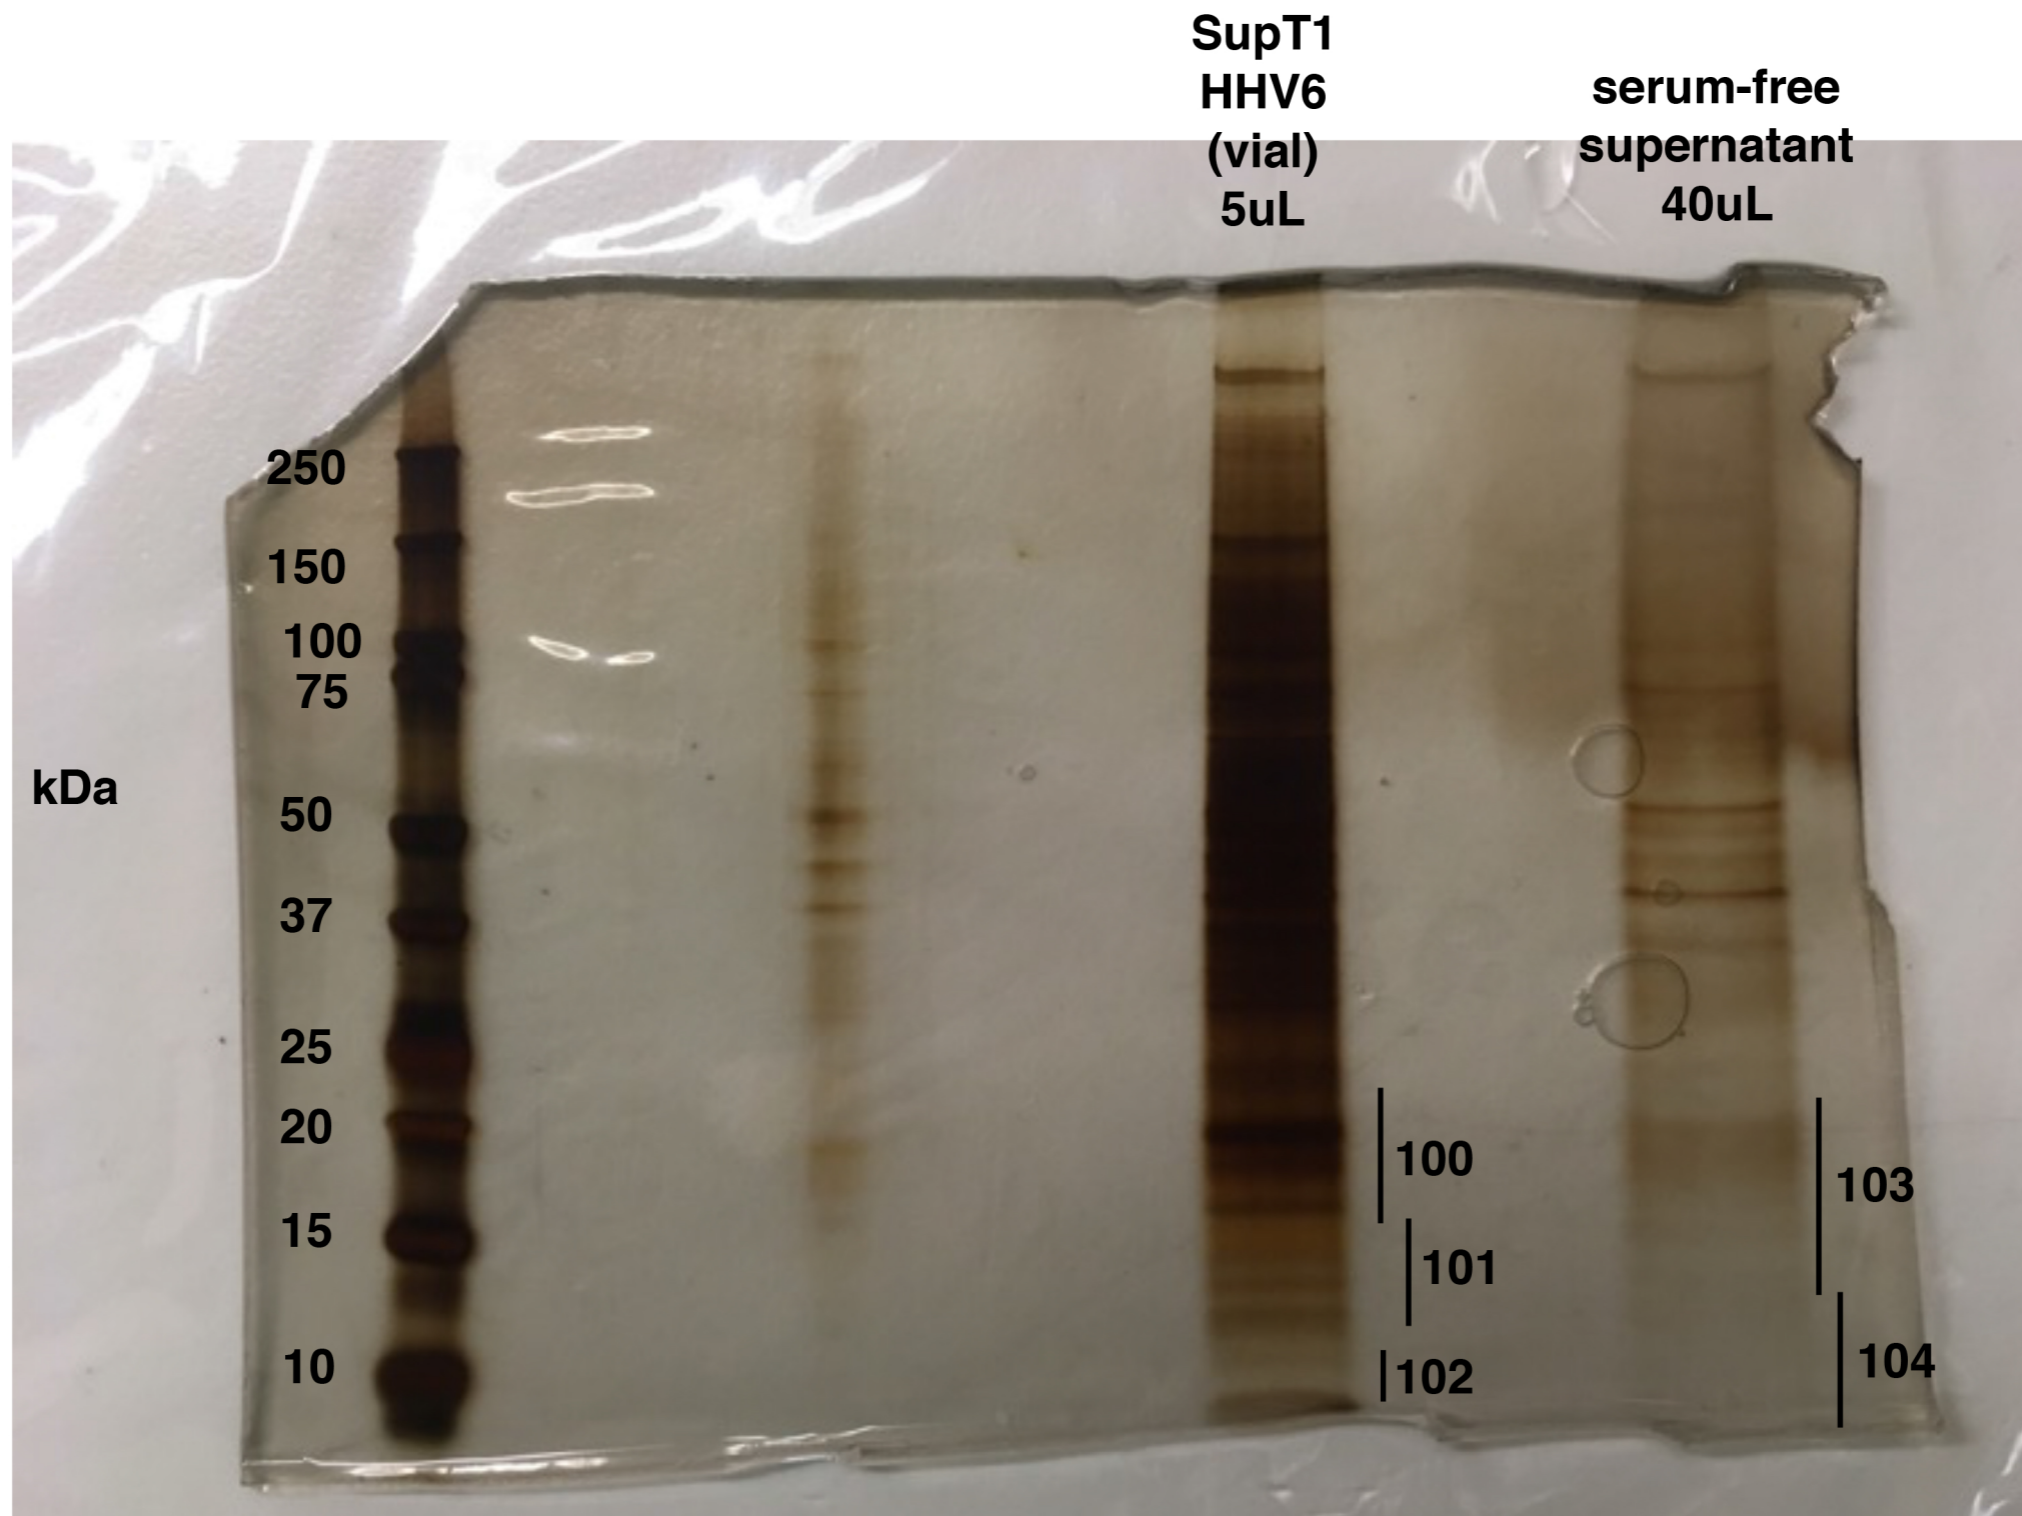

S4 Figure - Gel image of silver stain of HHV-6B Z29 lysate in SupT1 cells or serum-free supernatant run on 4-12% TrisHCl gel in MES buffer
